# Supplementary material
Source: PubMed Central journal article supplement (PMC9200086)
Supplement: plantbiotechnology-39-1-21.0924a-s001.pdf [file plantbiotechnology-39-1-21.0924a-s001.pdf]

Supplementary Table S1: Primer list

| Target gene<br>(AGI code)   | Sequence                          |
|-----------------------------|-----------------------------------|
| <i>TAA1</i><br>(AT1G70560)  | 5'- TTCGTGGTCAATCTGGATCATGG -3'   |
|                             | 5'- ACCACGTATCGTCACCGTACAC -3'    |
| <i>TAR1</i><br>(AT1G23320)  | 5'- CGCAGCGGTTTCCTTATTACTCCAC -3' |
|                             | 5'- TTGTCGAACGTCCTTGCGTCTC -3'    |
| <i>TAR2</i><br>(AT4G24670)  | 5'- GCTCTTCACTGCTTCAAAGAGCAC -3'  |
|                             | 5'- TCTGTCTTTCACCAAAGCCCATCC -3'  |
| <i>TAR3</i><br>(AT1G34040)  | 5'- GCTCAAGATTCGGCTGGGCATTAG -3'  |
|                             | 5'- AGCACGAAGCTGTGTGTCTCTTG -3'   |
| <i>TAR4</i><br>(AT1G34060)  | 5'- GCTATGTACAAGGACCAAGCAGAG -3'  |
|                             | 5'- TTCCACGCAGACGCATTTCC -3'      |
| <i>YUC1</i><br>(AT4G32540)  | 5'- ACCTCGTCCGACATAACGCATC -3'    |
|                             | 5'- TCCCTTGGCAACACATGAACGG -3'    |
| <i>YUC2</i><br>(AT4G13260)  | 5'- TTGGTGACACGGATCGGTTAGG -3'    |
|                             | 5'- CGTTTCAACTCCGGATACACCTTG -3'  |
| <i>YUC3</i><br>(AT1G04610)  | 5'- ATGGTCGTTTCGTAGCGCTGTTC -3'   |
|                             | 5'- CGAGCCAAACGGGCATATACTTC -3'   |
| <i>YUC4</i><br>(AT5G11320)  | 5'- CGTTCTTGATGTCGGTGCCATTTCC -3' |
|                             | 5'- GGCTTGCGTCACTTTAATTTGTCC -3'  |
| <i>YUC5</i><br>(AT5G43890)  | 5'- GATGGGCTCACAACGGAGTTTG -3'    |
|                             | 5'- TCGCCGGATTTGTACTCACACG -3'    |
| <i>YUC6</i><br>(AT5G25620)  | 5'- AAACCTCCGGTTCTCGACGTTGG -3'   |
|                             | 5'- CCCGAACACACCTTAATGTCTCC -3'   |
| <i>YUC7</i><br>(AT2G33230)  | 5'- GGATGGTCGAGTTCTGCAGATTG -3'   |
|                             | 5'- TCCTTAAGCCATGAAGGGACATTG -3'  |
| <i>YUC8</i><br>(AT4G28720)  | 5'- TGCGGTTGGGTTTACGAGGAAAG -3'   |
|                             | 5'- GCGATCTTAACCGCGTCCATTG -3'    |
| <i>YUC9</i><br>(AT1G04180)  | 5'- ATTATACGCGCCGGATTACAG -3'     |
|                             | 5'- AGCGATGTTAACGGCGTCTACTG -3'   |
| <i>YUC10</i><br>(AT1G48910) | 5'- AAATGTTCTTGTGGTCGGAGGTG -3'   |
|                             | 5'- TTCTTTAGTCACCACGTGTCTTGG -3'  |
| <i>YUC11</i><br>(AT1G21430) | 5'- GCCGGTTTACCAACATCAGCTTGT -3'  |
|                             | 5'- ATGGCATGTGAGGGAGTTGACAGA -3'  |
| <i>ACT8</i><br>(AT1G49240)  | 5'- TCAGCACTTTCAGCAGATG -3'       |
|                             | 5'- ATGCCTGGACCTGCTTCAT -3'       |
